# Supplementary material for: In situ U–Pb dating of 4 billion-year-old carbonates in the martian meteorite Allan Hills 84001
Source: Copernicus journal article supplement (doi:10.5194/gchron-4-683-2022), 2022-12-06
Supplement: Supplementary file 1 [file gchron-4-683-2022-supplement.zip]

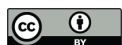

## *Supplement of*

# **In situ U–Pb dating of 4 billion-year-old carbonates in the martian meteorite Allan Hills 84001**

**Romain Tartèse and Ian C. Lyon**

*Correspondence to:* Romain Tartèse (romain.tartese@manchester.ac.uk)

- gchron-4-683-2022-supplement-title-page.pdf
- Raw
  - 220609\_UPb-ALH84001-ICPMS-AcqMethod.xml
  - 220609\_UPb-ALH84001-ICPMS.csv
  - 220609\_UPb-ALH84001-LaserConfig.lase
  - 220609\_UPb-ALH84001-LaserLog.csv
- Tartese&Lyon\_SuppFigS1.jpg
- Tartese&Lyon\_SuppTables.xlsx

The copyright of individual parts of the supplement might differ from the article licence.
