# Supplementary material for: In situ U–Pb dating of 4 billion-year-old carbonates in the martian meteorite Allan Hills 84001
Source: Copernicus journal article supplement (doi:10.5194/gchron-4-683-2022), 2022-12-06
Supplement: Supplementary file 1 [file Tartese&Lyon_SuppTables.xlsx]

## Sheet: Supplementary Table S1
Reference	Geological context	Age (Ma)	2s (Ma)	2s (%)	Sample
Drost et al. (2018)	Lacustrine limestone JS4, Rothenburg Fm., Saale Basin, Germany	253	14	0.055336	Encrusted bioclasts
		300.8	3.7	0.0123005	Transparent spar overgrowths
	Orthide brachiopod, Popovka River section, Russia	465	11	0.0236559	Dorsal valve							Age range (Ma)
Godeau et al. (2018)	Calcite S2 Urgonian limestone, Southeast France	91.7	2.2	0.0239913	Rustrel-a sample							[0-50]	177
		92	2.8	0.0304348	Rustrel-b sample							[50-100]	42
		92.8	2.3	0.0247845	La Nesque sample							[100-150]	17
		94.3	2.3	0.0243902	Col de la Ligne sample							[150-200]	23
		94.7	2.6	0.0274551	Font Jouvale sample							[200-250]	3
Mueller et al. (2020)	Alpujarride dolostones, Carboneras Fault Zone, Southern Spain	186.4	5.6	0.0300429	Zebra saddle dolomite Dol 2 (1)							[250-300]	4
		175	11	0.0628571	Zebra saddle dolomite Dol 2 (2)							[300-350]	1
		186.1	8	0.0429876	Early diagenetic dolostone Dol 1							[350-400]	0
Brigaud et al. (2021)	Hardground discontinuity cements, Paris Basin, France	163.5	6	0.0366972	Au4 Bon Mesnil limestone							[400-450]	0
		153	17.5	0.114379	BE2A top of Sarceau limestone							[450-500]	2
		146	15.5	0.106164	FAY11 top of Pentacrines oolithe
		174	17.7	0.101724									269		0.657993
		141	22.3	0.158156											0.962825
		146.5	4.2	0.0286689	SE1 top of Montlivaltia limestone
		145.6	9.4	0.0645604
		159.5	7.5	0.0470219	E436 Chaumont limestone
		164	9	0.054878
		154	12.7	0.0824675
		152.6	9.1	0.059633	VIL8 Vilhonneur limestone
Ring and Gerdes (2016)	Calcite, Alpenrhein and Bodensee Grabens, Central Alps	24	6.3	0.2625	H2 calcite fibers
		21.8	3.4	0.155963	H3 calcite fibers
		22.3	4.6	0.206278	H6 calcite fibers
		24.1	3.2	0.13278	H4 calcite fibers
		25.3	5.6	0.221344	H4 calcite fibers
		22.5	3.2	0.142222	H4-2 calcite fibers
Roberts and Walker (2016)	Calcite in faults, Faroe Islands, NE Atlantic margin	44.8	2	0.0446429	TJN-0-1 crack seal vein
		44.7	2.5	0.0559284	MOL-1-2 crack seal vein
		41.7	1.9	0.0455635	TJN-5-2 crack seal + breccia
		41.1	1.9	0.0462287	TOR-1-1 crack seal + bitumen
		40.9	8.1	0.198044	TJN-1-3 implosion breccia
		40.1	4.8	0.119701	MOL-1-1 crack seal vein
		37.7	1.9	0.0503979	TJN-6-1 dilational jog infill
		16.3	1.2	0.0736196	TJN-2-1 crack seal vein
		11.2	1.1	0.0982143	LEY-2-1 crack seal vein
Goodfellow et al. (2017)	Slickenfibre calcite, Oland, Fennoscandian Shield, Southeast Sweden	54.7	5.5	0.100548	Fault 1 F1-1
		67	6.7	0.1	Fault 1 F1-7
		64.2	6.4	0.0996885	Fault 1 F1-6
		63.3	6.3	0.0995261	Fault 2 F2-2
Nuriel et al. (2019)	Calcite, North Anatolian fault zone, Turkey	41.4	1.4	0.0338164	Sample NAFZ1
		43	1.5	0.0348837	Sample NAFZ2
		41.5	1.4	0.0337349	Sample NAFZ3
		11.3	3.1	0.274336	Sample NAFZ4a
		11.7	3.7	0.316239	Sample NAFZ4b
Nuriel et al. (2017)	Calcite, Dead Sea Transform, Israel	56.6	4.7	0.0830389	Sample NAV2b
		17.1	1.2	0.0701754	Sample NAV3b
		14.9	3.3	0.221477	Sample H2
		12.7	1.3	0.102362	Sample H3
		12.9	1.1	0.0852713	Sample H4
		12.9	1.3	0.100775	Sample H5
		18.6	3.2	0.172043	Sample GF1a
		20.1	1.8	0.0895522	Sample GF2
		18.5	1.8	0.0972973	Sample GF3b
		14	1.3	0.0928571	Sample GFS1
		17.7	1.4	0.079096	Sample GFS2
		17.8	1.5	0.0842697	Sample GFS2c
		18.1	1.6	0.0883978	Sample GFS3a
		19	1.6	0.0842105	Sample GFS4
		13.1	0.9	0.0687023	Sample GFS5
		13.1	0.8	0.0610687	Sample GFS5b
		16.7	1.7	0.101796	Sample GFS6
		20.8	3.3	0.158654	Sample GFS7
		15.8	1.2	0.0759494	Sample SFN1
		13.7	1.2	0.0875912	Sample SFN4
		16.7	2.8	0.167665	Sample YG2
		17	1.4	0.0823529	Sample YG3
		15.5	1.3	0.083871	Sample YF4c
		17.4	1.8	0.103448	Sample YF5
		16.5	1.2	0.0727273	Sample RD2
		92.3	5.6	0.0606717	Sample RD3a
		15.8	1.7	0.107595	Sample RD3b
		17.2	1.4	0.0813953	Sample RD4
		15.7	1.2	0.0764331	Sample RD5
		18.5	2.1	0.113514	Sample TS1
		6.2	1.1	0.177419	Sample TS2
Hansman et al. (2018)	Calcite fibers, Al Hajar Mountains, Oman	84	5	0.0595238	Sample CV-1
		64	4	0.0625	Sample CV2b_V1
		1.6	0.6	0.375	Sample CV2b_V2
		7.5	0.9	0.12	Sample CV2b_V3
		43	6	0.139535	Sample CV4_V1
		6	4	0.666667	Sample CV4_V2
		3.1	1.9	0.612903	Sample CV4_V3
		6.9	0.9	0.130435	Sample CV5_V1
		40	0.5	0.0125	Sample CV7_V1
		16.1	0.2	0.0124224	Sample CV7_V2
		22	4	0.181818	Sample CV-8
		55	22	0.4	Sample CV-12
		40.6	0.5	0.0123153	Sample SF-1_V1a
		39	1.4	0.0358974	Sample SF-1_V1b
		33.3	0.5	0.015015	Sample SF-1_V2a
		33.1	0.2	0.0060423	Sample SF-1_V2b
		21.5	0.3	0.0139535	Sample SF-1_V3
Beaudoin et al. (2018)	Calcite cements in veins, Bighorn Basin, Wyoming, USA	59.5	2.7	0.0453782	Sample BM18
		63.1	2.2	0.0348653	Sample BH14
		59.6	2.4	0.0402685	Sample BH6
		56.6	2.1	0.0371025	Sample BH12
		53.5	1.8	0.0336449	Sample BH11
		75.3	2.8	0.0371846	Sample LSM3
		2.4	0.2	0.0833333	Sample 24M
		72	3	0.0416667	Sample 21M A
		65.5	2.9	0.0442748	Sample 21M C
		1.8	0.6	0.333333	Sample 24M B
		45.4	1.8	0.0396476	Sample SMA1
		37.2	4.1	0.110215	Sample 20M
		5.6	0.5	0.0892857	Sample 47T
		66.9	7.5	0.112108	Sample R157
		58.4	5.6	0.0958904	Sample R153
		89.7	2.9	0.03233	Sample R135A
		86.3	2.8	0.032445	Sample R135B
		58.5	8.1	0.138462	Sample R155
		45.9	5.3	0.115468	Sample R152
		34.4	4.1	0.119186	Sample R93
		60.5	4.6	0.0760331	Sample R17
		53.7	3.1	0.0577281	Sample R98
		14.5	0.7	0.0482759	Sample R84(a)
		27.9	1.1	0.0394265	Sample R84(b)
Holdsworth et al. (2019)	Fracture calcite-fill, Rona Ridge, West of Shetland, UK	89.5	4	0.0446927	Clair Field 206/7a-2 well
		71.9	2.6	0.0361613	Victory Field 208/27-2 well
Smeraglia et al. (2019)	Calcite veins, Mt. Massico ridge tectnic mélange, Apennines, Italy	10.5	2.5	0.238095	Sample 257
		7	1.6	0.228571	Sample 239
		5.1	3.7	0.72549	Sample 260
		2.9	0.5	0.172414	Sample 247
Li et al. (2014)	Calcite cement, ammonites in Toarcian Beacon Limestone Fm., Dorset, UK	165.5	3.3	0.0199396	IS1 cement
Coogan et al. (2016)	Calcite veins, upper oceanic crust in various places	115	16	0.13913	595B-2R1–84–95
		86	14	0.162791	595B-3R2–12–18
		91.3	4.9	0.0536692	543–16R6–114.5–118
		81.5	3.3	0.0404908	163–29R5–0
		117.6	9.6	0.0816327	164–28R3–23
		115.6	5.4	0.0467128	164–28R4–44
		103.9	3.1	0.0298364	417D-27R4–61
		127.5	4.7	0.0368627	417D-31R4–8
		121.9	4.7	0.0385562	418A-15R3–144
		142.8	8.6	0.0602241	307 13R2 145
		105	19	0.180952	2012CL26
Burisch et al. (2017)	Calcite veins, Odenwald, SW Germany	178	2.9	0.0162921	Sample MB14 (calcite 1)
		177.6	2.8	0.0157658	Sample MB27 (calcite 1)
		172.6	8.7	0.0504056	Sample MB39 (calcite 1)
		172.6	6.9	0.0399768	Sample MB55 (calcite 1)
		59.1	3.4	0.0575296	Sample MB39 (calcite 2)
		13	5	0.384615	Sample MB39 (calcite 2)
		60.3	1.8	0.0298507	Sample MB55 (calcite 2)
Burisch et al. (2018)	Carbonate veins, Schwarzwald mining district, SW Germany	10.4	0.2	0.0192308	Johann Baptist calcite IIb
		2	0.1	0.05	Johann Baptist calcite IIc
		17.1	0.2	0.0116959	Frisch Glück calcite IIb
		20.8	0.7	0.0336538	Frisch Glück calcite IIa
		0.6	0.2	0.333333	Wenzel calcite IIc
		8	0.2	0.025	Wenzel dolomite IIb
		2.8	1.4	0.5	Bernhard im Hauserbach calcite IIc
		19.4	2.8	0.14433	Artenberg calcite IIa
		14	1.8	0.128571	Artenberg calcite IIb
		11.2	0.3	0.0267857	Artenberg dolomite IIb
		16.7	0.8	0.0479042	Brandenberg dolomite IIa
		20.6	0.2	0.00970874	Teufelsgrund calcite IIa
		16.4	0.2	0.0121951	Teufelsgrund calcite IIb
Walter et al. (2018)	Schwarzwald, Upper Rhinegraben rift, SW Germany	0.6	0.19	0.316667	TM111 Wenzel ankerite
		0.9	0.15	0.166667	TM87 Lierbach calcite
		2.1	0.42	0.2	BW300 Hammereisenbach siderite
		2.8	1.4	0.5	BW302 Bernhard im Haußerbach dolomite
		3	0.55	0.183333	BW301 Johann Baptist calcite
		3.2	0.3	0.09375	G6 König David calcite
		4	5.7	1.425	BO113 Böschlisgrund siderite
		4	2	0.5	TM113 Friedrich Christian calcite
		5.2	0.93	0.178846	TM127 Ohlsbach calcite
		5.7	1.2	0.210526	TM87 Lierbach dolomite
		6	3.1	0.516667	BW284/Jst47 Gauch (ore-rich) calcite
		6.8	0.2	0.0294118	G7 Sophia calcite
		6.9	0.6	0.0869565	G33 Sophia calcite
		7.3	3.8	0.520548	TM106 Schauinsland calcite
		7.8	0.5	0.0641026	G44 Gottesehre calcite
		7.9	0.7	0.0886076	G10 Sophia calcite
		8	0.24	0.03	TM99 Wenzel calcite
		8.5	9	1.05882	BW304 Lingellöcher siderite
		8.6	1.1	0.127907	G4 Rötenbach bei Alpirsbach calcite
		8.7	1.8	0.206897	BO121 Riggenbach siderite
		8.9	0.6	0.0674157	G23 Sophia calcite
		9.2	0.85	0.0923913	SW70 Sophia calcite with Ag
		9.8	0.56	0.0571429	BO57 Felsenkeller siderite
		10.4	0.1	0.00961538	BW271 Tennenbronn calcite
		10.4	0.22	0.0211538	BW301 Johann Baptist calcite
		10.5	0.29	0.027619	BW271 Tennenbronn calcite
		10.5	0.3	0.0285714	G21 Rötenbach calcite
		11.3	0.86	0.0761062	BW295 Giftgrube calcite
		11.7	2.6	0.222222	BW286 Bernhard im Haußerbach siderite/dolomite
		11.7	0.27	0.0230769	BW294/TM161 Fahl bei Todtnau calcite
		12.2	0.7	0.057377	G17 Rötenbach calcite
		13.5	1.9	0.140741	G14 Frischglück calcite
		13.7	2.7	0.19708	TM99 Wenzel calcite
		14	11	0.785714	SN49 Silbereck siderite
		14.4	1.2	0.0833333	G13 Frischglück calcite
		14.8	0.3	0.0202703	G1 Johann am Burgfelsen calcite
		15.8	6.1	0.386076	BW306 Anton Wieden dolomite/calcite
		16.4	0.23	0.0140244	BTR8 Teufelsgrund calcite
		16.6	0.72	0.0433735	BW293 Rappenloch siderite
		16.7	0.78	0.0467066	BW299/TM162 Brandenberg dolomite
		16.7	2.5	0.149701	BW267 Sophia Wittichen calite green calcite
		17	1.1	0.0647059	G28 Sophia calcite
		17.1	0.2	0.0116959	BW296 Frisch Glück im Sulzbächle calcite
		18.2	0.8	0.043956	G5 Sophia calcite
		18.6	0.53	0.0284946	TM111 Wenzel calcite
		19.3	2.7	0.139896	SW70 Sophia calcite with Ag
		19.6	1	0.0510204	BW280 Giftgrube calcite
		20.3	8.6	0.423645	SN49 Silbereck calcite
		20.6	0.21	0.0101942	BTR8 Teufelsgrund calcite
		20.8	0.69	0.0331731	BW191 Frisch Glück im Sulzbächle calcite
		21	1.8	0.0857143	G8 Anton im Heubach calcite
		21.2	6.2	0.292453	BW275 Hornberg calcite
		21.9	4.9	0.223744	BW290 Fuchsdobel calcite
		22.1	9.9	0.447964	BW305 Anton Wieden calcite
		28	16	0.571429	SN49 Silbereck siderite
		30.5	3.3	0.108197	BW272/SWK6 Hohe Tanne Waldkirch dolomite
		30.9	6.7	0.216828	Metz332 Teufelsgrund siderite
		31.1	1	0.0321543	BW273 Wickertsmühle calcite
		32.3	2	0.0619195	BW289 Fuchsdobel calcite
		34	4.7	0.138235	BW288 Fuchsdobel calcite
		34.1	1.6	0.0469208	BW140 Caroline Sexau calcite
		35	19	0.542857	BW292 Maria Theresia im Haußerbach dolomite
		37.6	0.93	0.024734	BW284/Jst47 Gauch calcite
		40	11	0.275	WS4 Wenzel calcite
		41.2	8.3	0.201456	G43 Sophia calcite
		67.8	3.4	0.0501475	TM86 Bernau quarry calcite
		68.4	2.4	0.0350877	BO113 Böschlisgrund siderite
		71	12	0.169014	BW273 Wickertsmühle calcite
		74	38	0.513514	BW286 Bernhard im Haußerbach siderite/dolomite
		116	50	0.431034	XSU19 Urenkopf calcite
		122	43	0.352459	TM127 Ohlsbach calcite
		133	21	0.157895	SAB17 Alpirsbach quarry dolomite/calcite
		136	15	0.110294	BW305 Anton Wieden calcite
		147	35	0.238095	SAB17 Alpirsbach quarry dolomite/calcite
		164	15	0.0914634	BW275 Hornberg calcite
		165.8	8	0.0482509	SAB17 Alpirsbach quarry dolomite/calcite
		173.9	9.1	0.0523289	SW70 Sophia calcite with Ag
		176	10	0.0568182	W278 Käfersteige calcite
		176.2	2.7	0.0153235	SW219 Sophia Wittichen calcite with UO2
		177.4	2.4	0.0135287	SW219 Sophia Wittichen calcite with UO2
		180.5	7.6	0.0421053	SW219 Sophia Wittichen calcite with UO2
		196	12	0.0612245	BW267 Sophia Wittichen (safflorite/calcite) calcite
		246	10	0.0406504	ML13a Schauinsland calcite
		248	14	0.0564516	TM86 Bernau quarry calcite
		277	6.3	0.0227437	BW340 Artenberg quarry calcite
		277.6	12	0.0432277	BW340 Artenberg quarry calcite
Bertok et al. (2019)	Valdieri marble, Argentera Massif, Italy	32.4	5	0.154321	Sample CC8
		33.1	5.5	0.166163	Sample MV200
		29.6	5.4	0.182432	Sample MV19
		30.7	1.3	0.0423453	Sample MV28
		30.5	1.8	0.0590164	Sample MV47
		30.8	3.3	0.107143	Sample MV52 dolomite
		30	2.9	0.0966667	Sample MV52 crosscutting vein
		31.3	2	0.0638978	Sample MV22
Drake et al. (2019)	Carbonate veins, Siljan impact structure, Sweden	80	5	0.0625	Sample VM2:170
		39	3	0.0769231	Sample VM2:170
		65	10	0.153846	Sample VM1:442
		22.2	2.5	0.112613	Sample VM2:212
		37.7	1.9	0.0503979	Sample VM1:255
		464	60	0.12931	Sample VM1:255
		39.2	1.4	0.0357143	Sample CC1:537
Drake et al. (2020)	Calcite vein, COSC-1 Borehole, Scandinavian Caledonides	9.6	1.3	0.135417	178 m sample
		2.5	0.2	0.08	178 m sample
MacDonald et al. (2019)	Basalt-hosted calcite veins, Arran, Loanhead and Mull, Scotland	224	8	0.0357143	Sample AR08
		291	33	0.113402	Sample JF7A
Scardia et al. (2019)	Calcite, Zarqa Valley, Jordan	1.7	0.3	0.176471	Calcite vein Ca2-a
		2	0.7	0.35	Calcite vein Ca2-b
		2	0.5	0.25	Calcite cement Ca4-a
		2.1	0.5	0.238095	Calcite vein Ca4-b
		2.1	1.1	0.52381	Calcite vein Ca5-a
		2.4	0.6	0.25	Calcite vein Ca5-b
		1.9	0.8	0.421053	Calcite vein Ca6
		2.9	0.8	0.275862	Calcite vein Ca7

## Sheet: Supplementary Table S2
Laboratory and Sample Preparation
Laboratory name	Department of Earth and Environmental Sciences, The University of Manchester
Sample type/mineral	Carbonates
Sample preparation	Polished section
Imaging	Back-scattered electron imaging and reflected light microscopy
Laser ablation system
Make, Model & type	Teledyne Photon Machines Analyte Excite+
Ablation cell & volume	HelEx II active 2-volume ablation cell, 100 mm × 100 mm sample area
Laser wavelength (nm)	193 nm (ArF excimer)
Pulse width (ns)	< 4 ns
Fluence (J.cm-2)	4 J.cm-2
Repetition rate (Hz)	5 Hz
Ablation duration (s)	50 s
Ablation pit depth / ablation rate	Not measured
Spot diameter (mm)	25 mm circle
Sampling mode / pattern	Static spot ablation
Carrier gas	100% He in the cell, N2 added at cell exit, and Ar make-up gas combined using a Y-piece 50% along the sample transport line to the torch
Cell carrier gas flow (l/min)	0.8 l/min He + 2 ml/min N2
ICP-MS Instrument
Make, Model & type	Agilent 8900 Q-ICP-MS
Sample introduction	Ablation aerosol via smoothing device
RF power (W)	1350W
Make-up gas flow (l/min)	Sourced from Agilent 8900, 0.76 l/min
Detection system	Dual‐mode discrete dynode electron multiplier
Masses measured (dwell times in ms)	13C (5), 26Mg (5), 29Si (5), 44Ca (5), 53Cr (5), 55Mn (5), 57Fe (5), 202Hg (20), 204Pb (20), 206Pb (50), 207Pb (80), 208Pb (15), 232Th (15), 238U (30)
Total integration time per output datapoint (s)	0.3180 s
Sensitivity	ca. 9,000 cps/μg.g-1 238U on NIST 612 (35 mm spot, 8 Hz, 5 J.cm-2)
Dead time (ns)	39.5 at mass 166
Data Processing
Gas blank	30 s between each analysis
Calibration strategy	Raw data were processed using Iolite v4.6.1. Reference glass NIST614 was used to remove instrument baseline contributions, mass bias of Pb isotopes, and downhole fractionation and instrumental drift of 206Pb/238U ratios. Mass bias correction of the measured 238U/206Pb ratios was carried out using repeated analyses of the reference calcite WC-1 (254.4 ± 6.4 Ma; Roberts et al., 2017). Duff Brown Ta…

## Sheet: Supplementary Table S3
09 June 2022, LAPS Facility, Earth and Environmental Sciences, The University of Manchester
						Data for Tera-Wasserburg plot - measured					Data for Tera-Wasserburg plot - corrected								Dates (Ma)					Intensities (counts/sec)
Identifier	206Pb (cps)	Uppm	Th/U	Pbppm		238U/206Pb	2se%	207Pb/206Pb	2se%		238U/206Pb	2se%	207Pb/206Pb	2se%		208Pb/232Th	2se%		207Pb/206Pb	2se (abs)	206Pb/238U	2se (abs)		Hg202_CPS	2se	Pb204_CPS	2se	Hg204_CPS_calc	2se	Pb204_CPS_corr	2se
NIST614_2	818.365	0.809541	0.917221	2.28028		1.41033	4.71541	0.86852	5.3559							1.5852	31.1344							100	49	33	24	23	11	10	26
NIST614_3	821.24	0.839928	0.900233	2.31936		1.44625	4.52414	0.873419	5.18691							1.64209	31.1903							32	49	42	23	7	11	34	25
NIST614_4	808.655	0.818378	0.910351	2.34826		1.3806	4.96277	0.870967	5.08118							1.60884	31.1174							29	45	85	24	7	10	74	24
NIST614_5	797.776	0.823055	0.906284	2.36658		1.41247	4.2301	0.871144	4.86887							1.64705	31.2862							63	41	52	21	14.3	9.5	38	23
NIST614_6	757.596	0.829459	0.925933	2.30612		1.43401	4.76325	0.872074	4.8731							1.56823	31.2062							74	51	40	23	17	12	23	27
NIST614_7	768.545	0.832992	0.896474	2.32337		1.42636	4.74317	0.868503	4.9349							1.69634	31.1566							19	44	64	22	4.3	10	62	24
NIST614_8	747.228	0.816621	0.877358	2.29004		1.41544	4.90058	0.877221	5.57118							1.76639	31.463							75	47	32	21	17	11	15	23
NIST614_9	717.235	0.819272	0.923983	2.34989		1.46347	5.06741	0.888	5.48734							1.61957	31.2582							32	39	50	23	7.2	8.9	39	24
NIST614_10	777.278	0.822096	0.909884	2.30771		1.36477	5.28624	0.85705	5.08856							1.52899	31.1429							42	49	42	26	10	11	32	27
NIST612_1	11173.9	31.8846	1.11845	32.1346		4.10919	2.56555	0.877228	3.98777							0.486487	30.639							36	49	661	44	8	11	652	44
NIST612_2	11253.9	32.3161	1.11838	32.5389		4.11624	2.52311	0.869784	3.96715							0.487139	30.6435							68	44	673	50	16	10	658	51
NIST612_3	11282.2	32.8446	1.11891	32.9372		4.17181	2.53901	0.873797	3.91309							0.485511	30.6476							42	42	702	44	9.7	9.6	692	44
NIST612_4	11126.1	32.5951	1.02921	32.5932		4.12425	2.53596	0.867629	3.89215							0.493254	30.6448							110	54	679	41	25	12	654	43
NIST612_5	10636.4	32.2278	1.07218	32.3159		4.20703	2.46057	0.912417	3.87734							0.49453	30.644							95	49	630	43	22	11	608	44
NIST612_6	10660.2	32.9857	1.09541	33.2112		4.19719	2.5711	0.880689	3.91469							0.50689	30.6561							55	48	647	49	13	11	635	51
NIST612_7	10341.7	32.7229	1.18982	33.5615		4.22446	2.5958	0.838829	3.8925							0.514709	30.6347							133	44	629	42	31	10	598	44
NIST612_8	10305.7	32.2445	1.14948	33.5108		4.15517	2.49783	0.847675	3.87402							0.522326	30.6522							45	48	608	43	10	11	597	46
WC1_1	293.359	4.34795	-0.000148035	0.0525738		20.6241	6.09841	0.132911	16.9282		20.6889	6.30481	0.132911	17.0133		-42.8077	-52.3129		2136.78	270.786	304.292	18.7121		87	46	10	25	20	10	-10	26
WC1_2	253.78	4.22034	-0.000149967	0.0410419		23.1462	6.50928	0.0957832	30.8033		23.219	6.70304	0.0957832	30.8502		-35.5684	-59.3662		1543.52	489.975	271.823	17.817		72	46	34	24	16	10	16	26
WC1_3	278.139	4.51849	0.0116732	0.0500555		22.8044	8.11291	0.121126	25.2118		22.8761	8.26918	0.121126	25.269		3.00081	105.466		1972.88	392.675	275.811	22.2877		110	54	14	26	25	12	-1	31
WC1_4	223.816	3.83995	-0.000671084	0.00337783		23.3695	6.42521	0.11077	21.39		23.443	6.62143	0.11077	21.4574		0.492864	692.168		1812.09	345.954	269.279	17.4393		-20	47	26	19	-4	11	36	24
WC1_5	309.654	5.70656	-0.000562412	0.0353307		24.6968	6.78175	0.0563491	30.7806		24.7745	6.96793	0.0563491	30.8275		-4.73851	-78.5095		466.148	567.666	255.089	17.4038		120	50	-25	22	27	11	-49	26
WC1_6	229.562	4.0126	-0.00066709	0.0224331		22.9213	7.50938	0.10436	25.6433		22.9934	7.67795	0.10436	25.6996		-4.39554	-103.666		1703.06	410.759	274.434	20.5958		-13	44	3	21	-3	10	7	24
WC1_7	262.078	4.975	0.0138378	0.0236813		25.6695	6.18057	0.0811025	24.3327		25.7502	6.38431	0.0811025	24.392		-0.095761	-514.38		1223.93	416.527	245.606	15.3669		42	49	28	23	10	11	18	27
WC1_8	229.05	4.26649	0.014044	0.0295956		23.6517	6.91479	0.0873054	26.7145		23.7261	7.09749	0.0873054	26.7685		-0.156644	-31.4743		1367.24	443.294	266.132	18.4776		39	40	-11	22	8.9	9.1	-20	24
WC1_9	286.979	5.14273	-0.000148238	0.0807688		22.7948	6.23563	0.10532	18.7031		22.8665	6.43763	0.10532	18.7802		-66.5059	-40.0041		1719.9	310.294	275.925	17.3648		11	42	7	22	2.5	9.6	5	25
WC1_10	248.725	4.58143		0.0702991		23.3886	6.31074	0.0805692	24.0277		23.4621	6.51041	0.0805692	24.0878					1210.96	412.69	269.064	17.1338		37	45	-2	19	8	10	-15	21
B6_1	26.4959	2.86372	-0.000200866	0.00806394		152.761	27.7248	0.372707	239.862		153.241	27.771	0.372707	239.868		-7.51604	-292.687		3802.46	1764.99	41.9304	11.5963		58	56	32	29	13	13	19	32
B6_2	24.6349	2.93721	-0.00019553	0.00138039		169.491	29.9432	-0.0375966	-726.868		170.024	29.9859	-0.0375966	726.87		-1.98489	-941.994				37.8038	11.2927		47	50	22	24	11	11	11	24
B6_3	28.6486	3.24161	0.0180117	0.0340121		149.692	23.814	-0.187283	-145.184		150.163	23.8676	-0.187283	145.194		0.432294	207.023				42.7872	10.1705		54	48	16	22	12	11	7	26
B6_4	77.5038	8.26742		0.0134645		145.617	9.9302	0.0794393	115.778		146.075	10.0583	0.0794393	115.791					1183.1	1388.48	43.9804	4.40711		84	42	12	20	19.2	9.7	-8	23
B6_5	67.4025	8.14882	-6.99146e-05	-0.00215788		163.954	12.6148	0.203447	42.9803		164.47	12.7158	0.203447	43.0139		0.931325	1724.67		2854.05	568.683	39.0765	4.95197		82	49	-7	20	19	11	-26	23
B6_6	61.4842	7.33333	0.00515575	0.0169917		154.266	11.8914	0.110457	117.597		154.751	11.9985	0.110457	117.609		-0.135415			1806.94	1315.44	41.5226	4.96417		78	43	14	23	18	9.9	-5	25
B6_7	114.093	13.5055		0.029392		150.143	12.7543	0.129503	63.1697		150.615	12.8543	0.129503	63.1926					2091.24	824.611	42.6591	5.4631		32	59	-24	28	7	14	-35	33
B6_8	110.006	13.3071	0.00334632	0.0373351		158.065	12.6144	0.201511	56.6984		158.562	12.7154	0.201511	56.7239		3.92438e-05			2838.47	711.104	40.5279	5.13508		96	66	28	33	22	15	6	36
DBT_1	361.687	12.5605	0.00726547	0.505163		47.5367	5.53965	0.413181	8.8443		47.6861	5.76609	0.413181	9.0062		2.72068	34.5946		3957.75	128.755	133.786	7.63022		134	51	32	21	31	12	2	26
DBT_2	349.616	16.5269	0.00487745	0.358959		62.5159	5.37082	0.347131	8.4921		62.7125	5.60408	0.347131	8.66059		2.28599	33.7258		3694.45	126.114	101.982	5.6677		50	46	41	23	11	11	29	25
DBT_3	332.18	14.2702	-0.000400783	0.417605		52.1033	7.09053	0.407481	9.69544		52.2672	7.26881	0.407481	9.84335		-38.598	-49.3253		3936.91	140.307	122.171	8.79075		-47	43	37	22	-10.9	9.9	48	23
DBT_4	328.385	15.0906	0.00637055	0.335364		60.495	5.60429	0.33507	9.25058		60.6852	5.82821	0.33507	9.40548		1.90011	33.7158		3640.43	136.931	105.361	6.0879		79	46	19	22	18	10	0	24
DBT_5	324.283	11.0229	-0.00025819	0.486799		40.3021	8.05941	0.426076	9.00341		40.4289	8.21669	0.426076	9.1625		-75.1834	-48.5255		4003.75	130.525	157.511	12.7727		72	44	29	21	16	10	13	23
DBT_6	292.812	9.92848	0.00937528	0.401856		43.9059	6.29189	0.407491	11.507		44.044	6.49214	0.407491	11.6319		2.80917	34.8819		3936.95	164.325	144.726	9.28445		89	42	-12	21	20.4	9.6	-33	23
DBT_7	309.245	10.6256	-0.000380115	0.464605		45.2312	6.26155	0.382127	9.21253		45.3734	6.46274	0.382127	9.36807		-55.7295	-51.3125		3840.2	134.655	140.532	8.97766		86	45	11	23	20	10	-9	25
DBT_8	389.691	11.1211	0.00912024	0.637836		37.6351	5.88291	0.416587	7.85746		37.7534	6.09661	0.416587	8.03926		3.82736	33.179		3970.05	115.412	168.528	10.1334		47	38	2	22	10.8	8.7	-10	23
DBT_9	354.159	9.20284	0.0134277	0.61267		34.1672	6.95829	0.472321	9.06259		34.2746	7.13988	0.472321	9.22066		3.05592	33.6908		4157.06	130.152	185.39	13.0349		157	45	45	26	36	10	5	28
DBT_10	288.187	10.4286	-0.000313298	0.405859		47.821	6.29449	0.399038	10.0065		47.9714	6.49466	0.399038	10.1499		-53.9127	-48.358		3905.46	144.731	132.999	8.54367		68	46	-11	22	16	10	-23	24
DBT_11	368.749	13.9426	-0.000284306	0.429774		45.9467	7.73456	0.369645	9.00828		46.0911	7.89832	0.369645	9.16729		-93.9271	-45.1844		3789.96	132.324	138.367	10.8031		49	44	37	20	11	10	29	23
DBT_12	383.619	17.9853	0.00657611	0.457178		62.389	5.6761	0.328024	9.29227		62.5852	5.8973	0.328024	9.4465		2.49962	34.4045		3607.87	137.802	102.188	5.97605		94	49	0	21	22	11	-22	24
ALH84_MgRich_1	271.973	0.260814	0.75508	0.114461		1.06125	29.1517	0.403671	28.2379		1.06458	29.1956	0.403671	28.289		0.335746	106.307		3922.81	370.075	4269.75	852.638		1590	330	460	130	364	76	100	110
ALH84_MgRich_3	160.498	0.144486	0.566215	0.115509		1.16891	23.7967	0.535617	25.1635		1.17259	23.8505	0.535617	25.2208		0.246696	234.941		4342.35	326.841	3975.55	671.465		980	300	100	100	225	68	-123	82
ALH84_MgRich_4	207.151	0.186548	0.644469	0.128383		1.22631	18.0769	0.429518	24.815		1.23016	18.1475	0.429518	24.8731		0.40446	60.6769		4015.77	328.592	3835.15	504.314		870	140	208	45	199	33	10	50
ALH84_MgRich_5	432.566	0.413672	1.20719	0.199224		1.28665	8.68953	0.357027	12.4067		1.29069	8.8356	0.357027	12.5226		0.188604	38.9869		3737.25	178.337	3698.15	243.974		617	88	137	42	141	20	-4	42
ALH84_MgRich_6	218.024	0.183058	0.735625	0.102807		1.05965	12.9354	0.385004	20.0673		1.06298	13.0339	0.385004	20.1392		0.316166	76.779		3851.52	274.521	4274.45	394.936		650	120	176	44	149	28	27	49
ALH84_MgRich2_1	395.596	0.386983	1.25018	0.245564		1.22404	8.80926	0.404859	9.67713		1.22789	8.95338	0.404859	9.82531		0.256958	37.1146		3927.22	140.145	3840.49	253.996		523	72	127	35	120	17	1	36
ALH84_MgRich2_2	284.271	0.241056	0.917481	0.121933		1.08626	15.2404	0.437834	20.9314		1.08967	15.3241	0.437834	21.0003		0.279397	60.9054		4044.39	281.895	4197.46	456.203		1110	300	236	90	254	68	-18	70
ALH84_MgRich2_4	254.556	0.261	1.02425	0.111438		1.31259	12.2633	0.434715	12.8001		1.31672	12.3672	0.434715	12.9125		0.20721	45.5314		4033.73	180.228	3642.28	335.255		607	89	112	42	139	20	-34	41
ALH84_CaRich_1	225.215	0.215294	0.412202	0.0629738		1.13275	23.952	0.41335	25.6991		1.13631	24.0054	0.41335	25.7553		0.430594	108.634		3958.37	340.026	4069.59	686.489		420	140	146	86	96	33	50	93
ALH84_CaRich_2	293.021	0.259741	0.67846	0.0993069		1.03573	9.77361	0.38339	9.64143		1.03899	9.90371	0.38339	9.79016		0.228711	52.9823		3845.18	140.378	4346.22	305.747		711	74	161	31	163	17	-2	33
ALH84_CaRich_3	411.842	0.427161	0.98093	0.190087		1.32404	13.8777	0.376708	19.1713		1.32821	13.9696	0.376708	19.2465		0.26746	50.3331		3818.61	263.983	3618.17	375.636		2970	210	700	100	682	48	20	100
ALH84_CaRich_4	298.739	0.273045	0.978097	0.15714		1.16596	9.69343	0.404187	12.499		1.16963	9.82459	0.404187	12.6141		0.282514	40.6345		3924.73	177.468	3983.04	285.493		940	110	211	44	216	24	-5	40
ALH84_CaRich_5	455.694	0.377825	0.237691	0.0608808		1.12826	10.0237	0.474239	10.7203		1.13181	10.1506	0.474239	10.8543		0.394403	83.2626		4163.06	151.915	4081.56	299.862		370	95	78	46	85	22	-7	52
ALH84_CaRich_6	454.178	0.367582	0.205517	0.0339217		1.03551	9.16556	0.464551	12.0206		1.03877	9.30417	0.464551	12.1402		0.165804	165.577		4132.48	169.129	4346.89	287.675		342	84	98	36	78	19	19	45
